# Supplementary material for: Immobilization of Enological Pectinase on Magnetic Sensitive Polyamide Microparticles for Wine Clarification
Source: MDPI journal article supplement (doi:10.3390/foods13030420), 2024-01-28
Supplement: s1 [file s1]

# Immobilization of Enological Pectinase on Magnetic Sensitive Polyamide Microparticles for Wine Clarification

Sandra Cristina Oliveira, Nadya Vasileva Dencheva \* and Zlatan Zlatev Denchev

IPC—Institute for Polymers and Composites, Campus of Azurém, University of Minho, 4800-058 Guimarães, Portugal; b8223@dep.uminho.pt (S.C.O.); denchev@dep.uminho.pt (Z.Z.D.)

\* Correspondence: nadiad@dep.uminho.pt

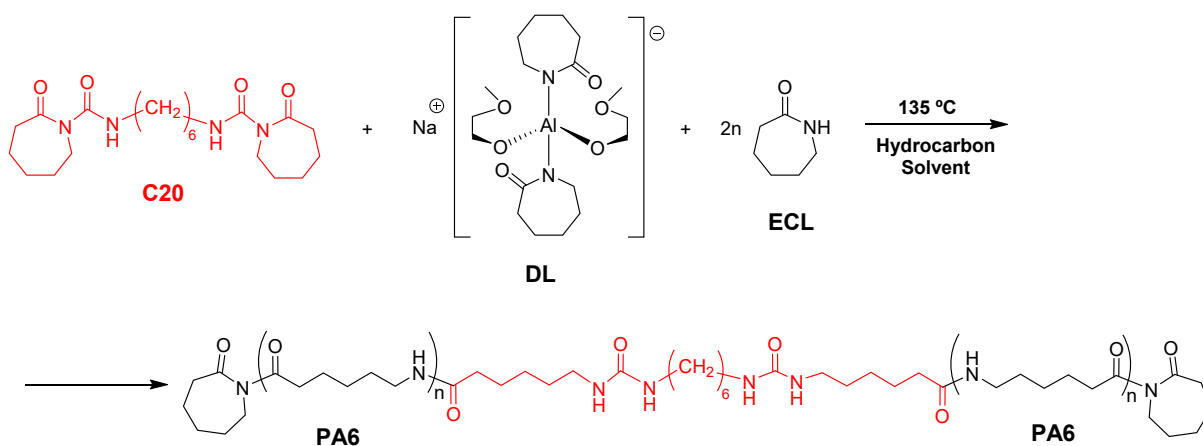

**Figure S1.** Chemical reactions occurring during AAROP of  $\epsilon$ -caprolactam (ECL) to neat PA6 MP. The active substance of the AAROP activator is designated as C20; The chemical structure of the AAROP initiator dicaprolactamato-bis-(2-methoxyethoxy)-aluminate (DL) is presented wherein  $R = \text{OCH}_2\text{CH}_2\text{OCH}_3$ .

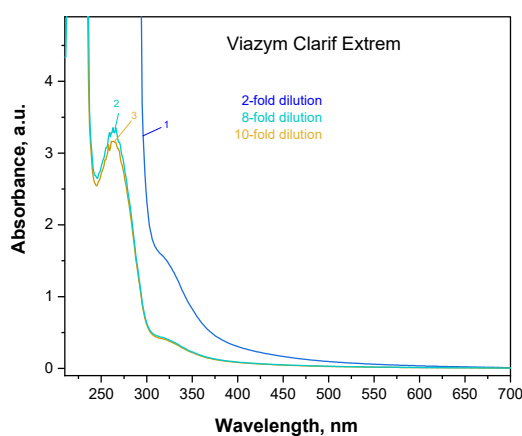

**Figure S2.** Determination of the optimal dilution of the enzymatic preparation that enables direct UV/VIS quantification of the peak at 263 nm.

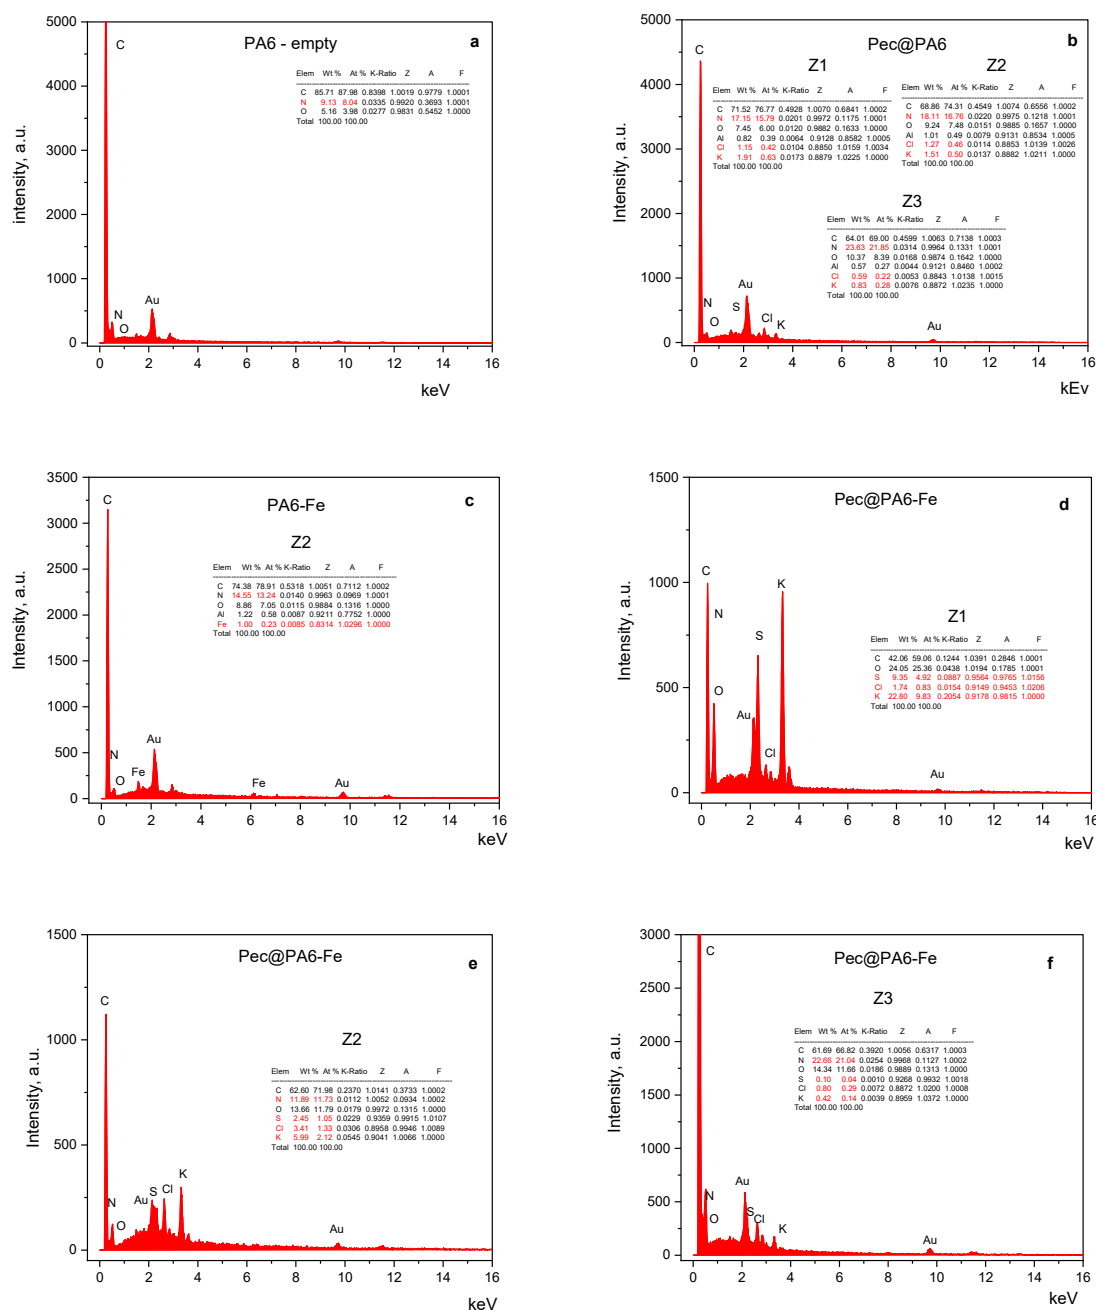

**Figure S3.** EDX results about the composition of empty supports and PEC@PA MP complexes. PA6 = empty PA6 support particles; PA6-Fe = PA6-Fe empty support particles; Pec@PA6 = Viazym-immobilized PA6 MP; Pec@PA6-Fe = Viazym-immobilized PA6-Fe MP. The specific sites  $Z_i$  where the EDX was performed are indicated in the main manuscript, Figure 1.

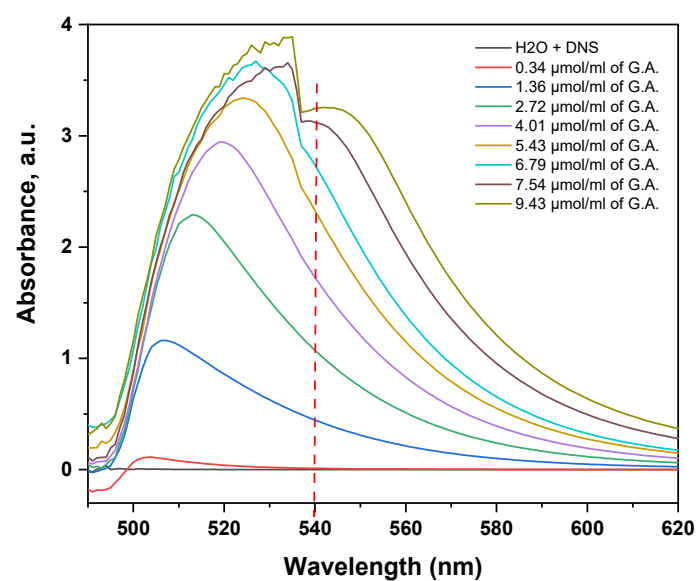

**Figure S4.** Evolution of the UV/VIS absorption maxima of various concentrations of galacturonic acid treated with the DNS reagent. G.A. = galacturonic acid. The vertical line at 540 nm indicates the position of the peak of the resulting 5-amino-3-nitrosalicylic acid colored product used in the construction of the standard calibration plot used in the pectinase activity assay.

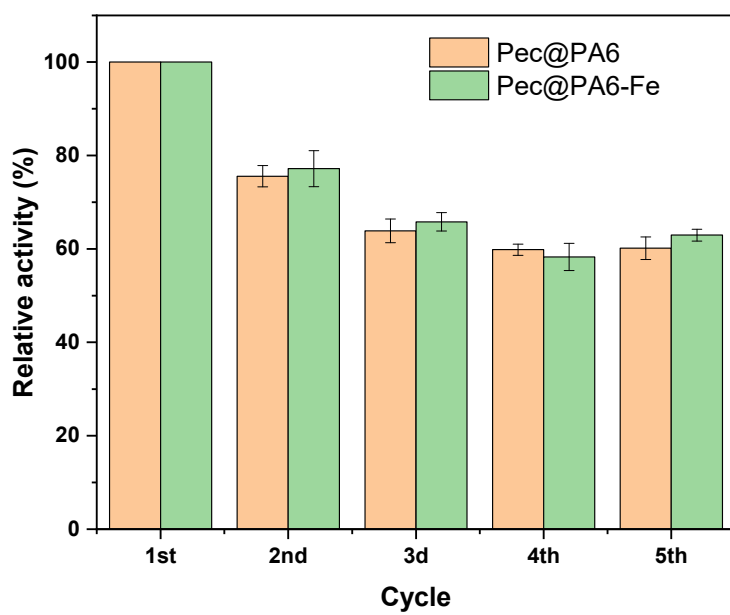

**Figure S5.** Relative activity of Pec@PA6 and Pec@PA6-Fe during 5 consecutive cycles
